# Supplementary material for: Ceria-based nanocomposites for the enrichment and identification of phosphopeptides
Source: Royal Society of Chemistry journal article supplement (doi:10.1039/c3an00868a), 2013-01-01
Supplement: c3an00868a.pdf [file c3an00868a.pdf]

## Supporting Information

### Ceria-based Nanocomposites in Enrichment and Identification of Phosphopeptides

Batool Fatima<sup>1</sup>, Muhammad Najam-ul-Haq<sup>1\*</sup>, Fahmida Jabeen<sup>1</sup>, Saadat Majeed<sup>1,3</sup>,  
Muhammad N. Ashiq<sup>1</sup>, S. Ghulam Musharraf<sup>2</sup>, Muhammad A. Shad<sup>1</sup>, Guobao Xu<sup>3</sup>

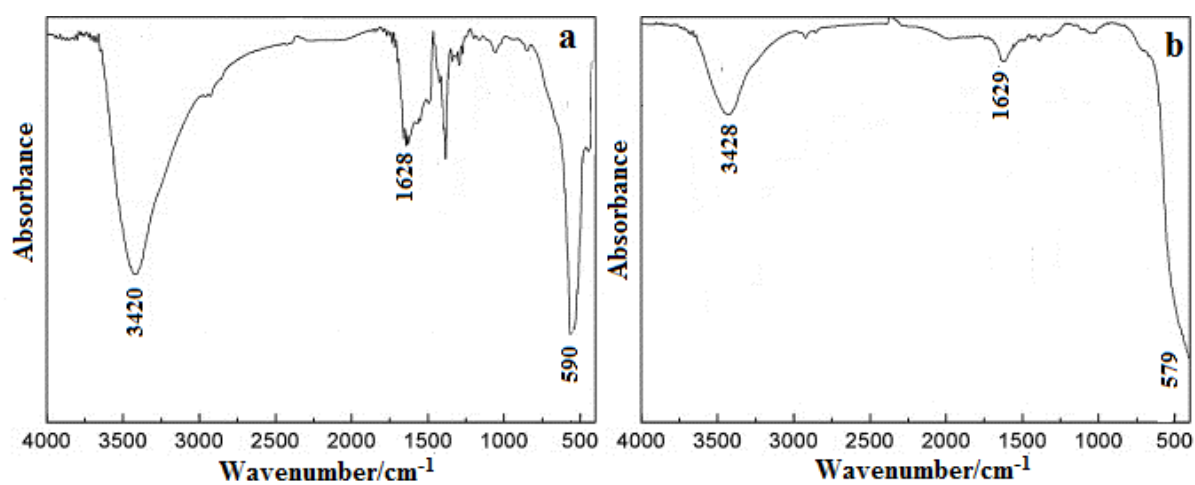

**Figure 1S:** FT-IR characterisation of ceria-nanocomposites (a) Ceria-iron nanocomposite. (b) Ceria-tin oxide nanocomposite.

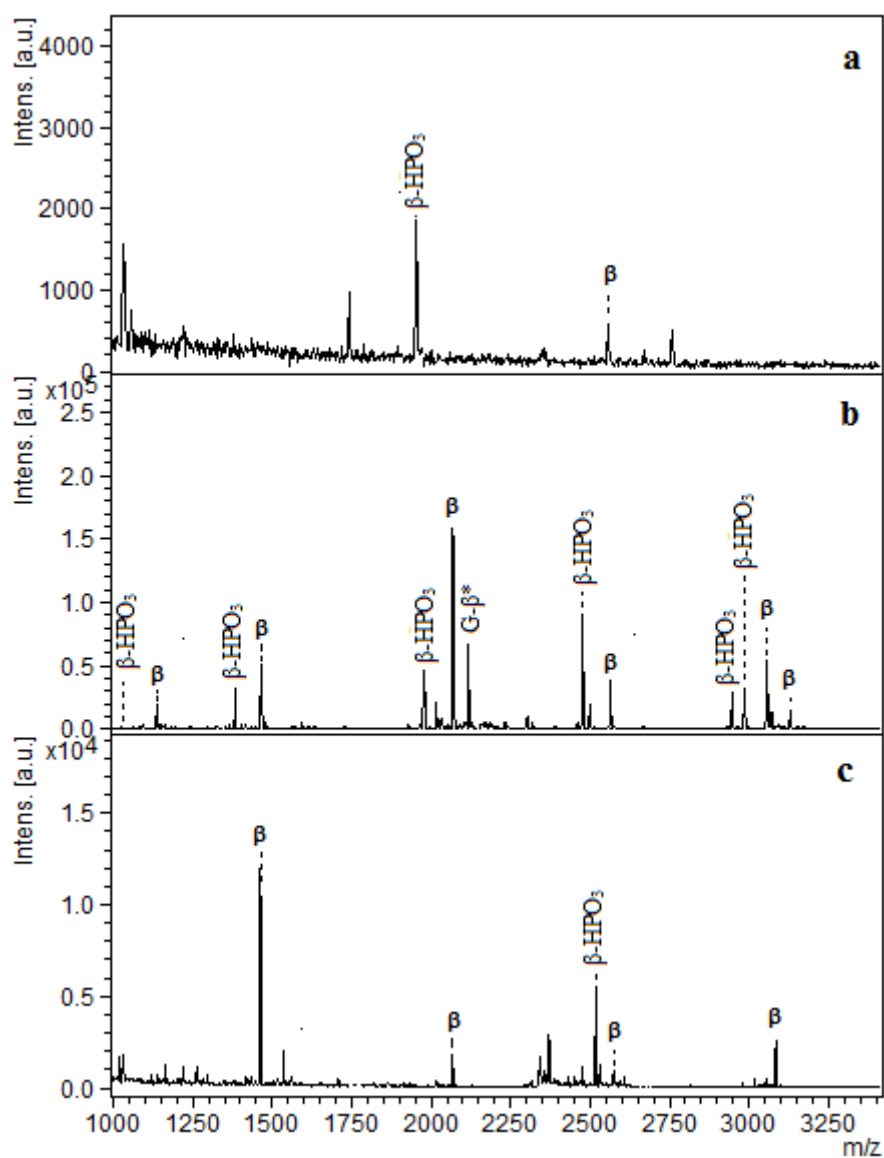

**Figure 2S:** MALDI-MS spectra of tryptic  $\beta$ -casein (1  $\mu\text{g/mL}$ ) for phosphopeptide enrichment after elution for ceria-iron oxide nanocomposite in different ratios (a) Ce:Fe (1:2); (b) Ce:Fe (1:1); (c) Ce:Fe (2:1). The phosphopeptides, dephosphorylated and acidic residue derived from  $\beta$ -casein are marked with  $\beta$ ,  $\beta\text{-HPO}_3$  and  $\text{G-}\beta^*$  respectively.

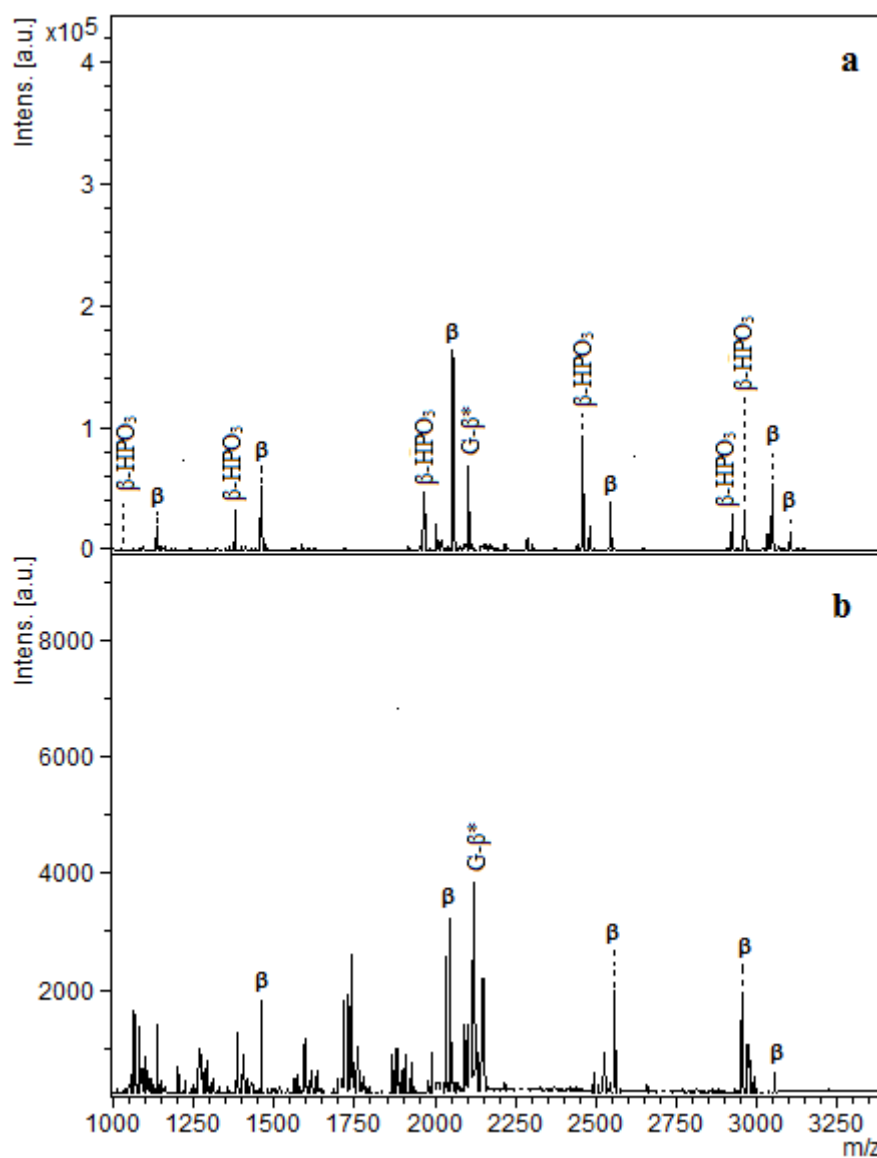

**Figure 3S:** MALDI-MS spectra of tryptic  $\beta$ -casein (1  $\mu\text{g/mL}$ ) for phosphopeptide enrichment after elution for (a) ceria-iron oxide nanocomposite, Ce:Fe (1:1). (b) Fe<sub>3</sub>O<sub>4</sub> nanoparticles; The phosphopeptides, dephosphorylated and acidic residue derived from  $\beta$ -casein are marked with  $\beta$ ,  $\beta$ -HPO<sub>3</sub> and G- $\beta^*$  respectively.

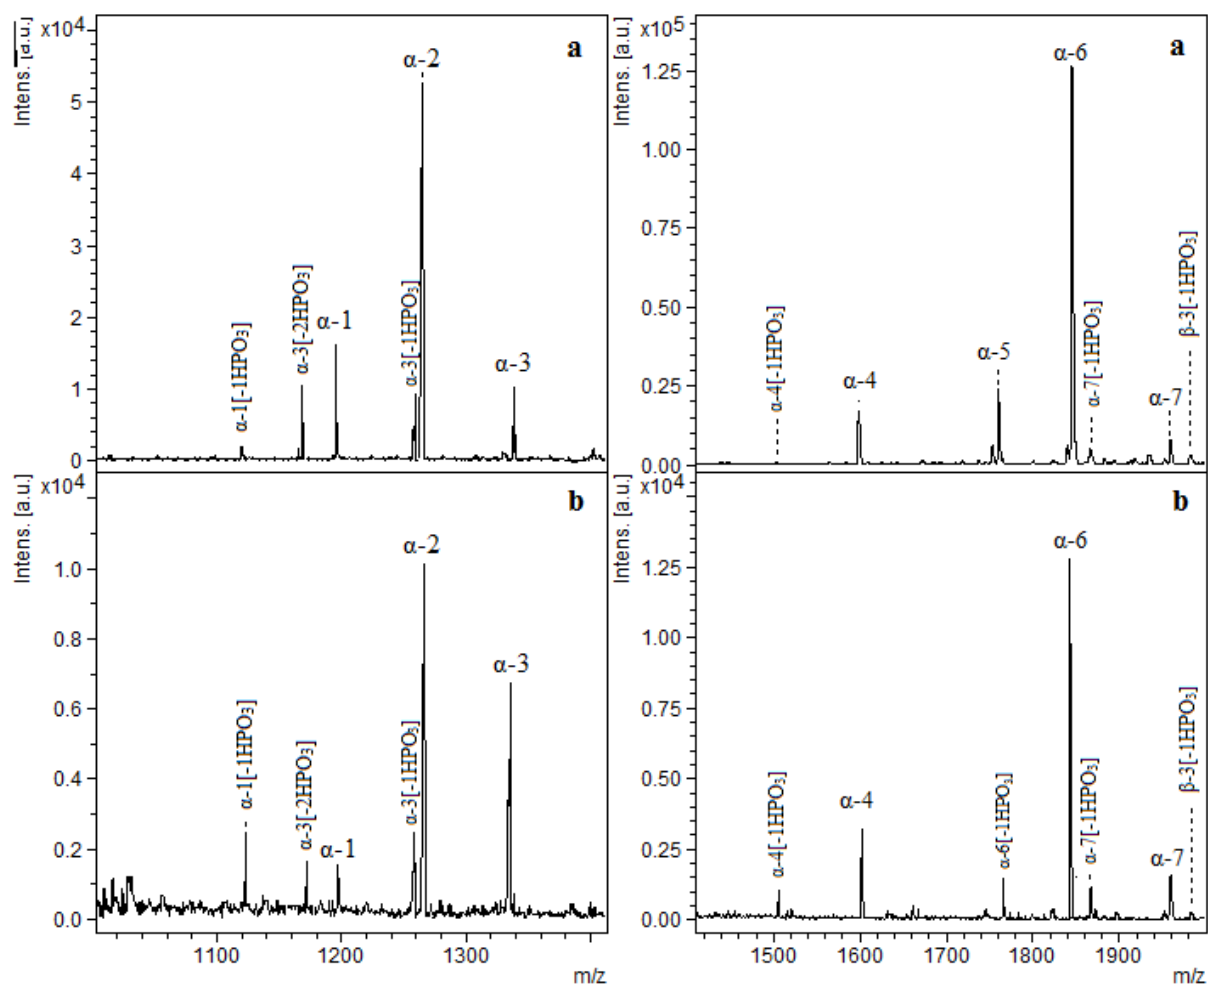

**Figure S4A:** MALDI-MS spectra of tryptic digest of non-fat milk for (a) after enrichment with ceria-iron oxide nanocomposite (b) after enrichment with ceria-tin oxide nanocomposite in two mass ranges for 1000-1500 Da and 1500 to 2000 Da. All identified peptide residues derived from non-fat milk are labelled as  $\alpha$  and  $\beta$  for phosphopeptides derived from  $\alpha$ - and  $\beta$ -casein and dephosphorylated fragments with -nHPO<sub>3</sub>.

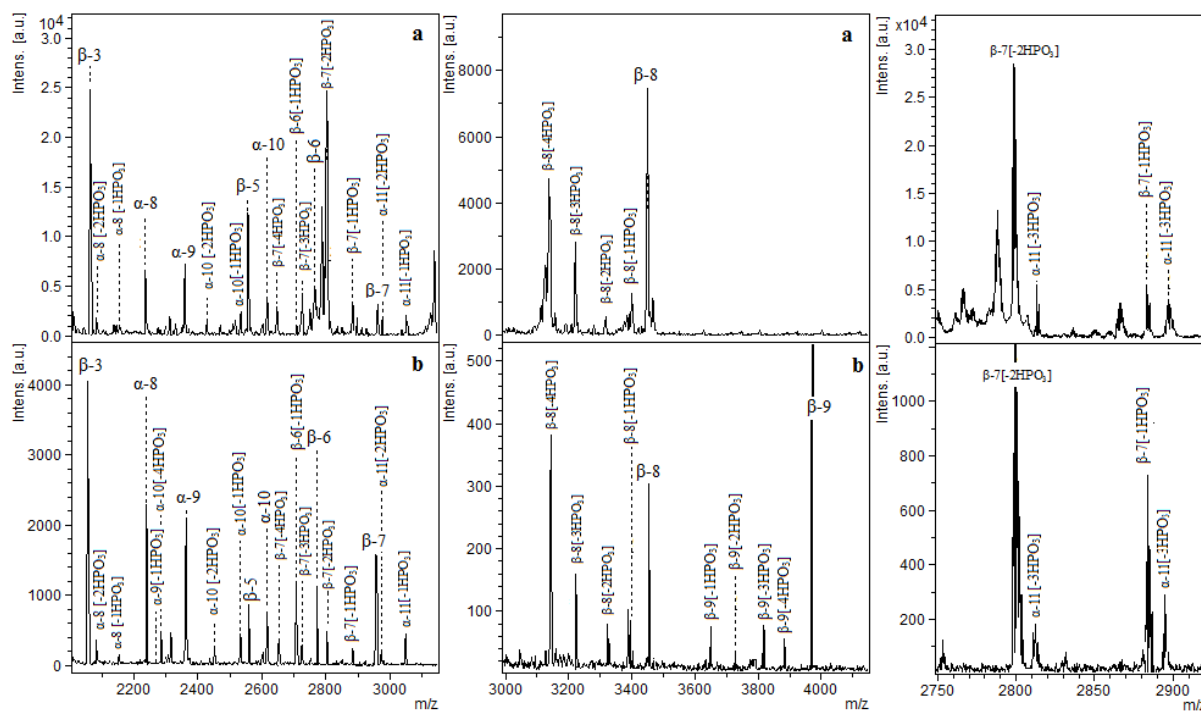

**Figure S4B:** MALDI-MS spectra of tryptic digest of non-fat milk in mass range for (a) after enrichment with ceria-iron oxide nanocomposite (b) after enrichment with ceria-tin oxide nanocomposite for 2000-3000 Da, 3000-4000 Da and excessive zoomed mass range for 2800-2900 Da. All identified peptide residues derived from non-fat milk are labelled as  $\alpha$  and  $\beta$  for phosphopeptides derived from  $\alpha$ - and  $\beta$ -casein and dephosphorylated fragments with -nHPO<sub>3</sub>.

**Table S1:** Comparison of individual metal oxides and their synthesized nanocomposites in context to the literature.

| Materials                                          | Samples Standards | Sample loading/<br>Concentration | Sensitivity | Remarks                                                                                               | Ref. no.             |
|----------------------------------------------------|-------------------|----------------------------------|-------------|-------------------------------------------------------------------------------------------------------|----------------------|
| <b>CeO<sub>2</sub> NPs (26 nm)</b>                 | β-casein          | 1 μmol                           | 1.25 fmol   | Dephosphorylation is highlighted. Serum analysis also present                                         | 27                   |
| <b>Fe<sub>3</sub>O<sub>4</sub></b>                 | β-casein          | 1 pmol                           | 100fmol     | Comparative study for Fe(II) and Fe(III),                                                             | 28                   |
| <b>SnO<sub>2</sub></b>                             | Standard peptides | 1 μg                             | no results  | Recovery studies, optimization and comparison to commercial materials                                 | 29                   |
| <b>CeO<sub>2</sub>-Fe<sub>2</sub>O<sub>3</sub></b> | β-casein          | 1 pmol                           | 10-100 fmol | Presence of acidic residues, dephosphorylation, Fibrinogen detected from serum as in CeO <sub>2</sub> | <i>Present study</i> |
| <b>CeO<sub>2</sub>-SnO<sub>2</sub></b>             | β-casein          | 1 pmol                           | 10-100 fmol | No acidic residues. Reduce enrichment of high mass peptides with increase complexity.                 | <i>Present study</i> |

**Table S2:** Overview of the identified peptides with dephosphorylated fragments for both ceria-nanocomposites by employing non-fat milk digest.

| Peak No.        | [M+H] <sup>+</sup> | Amino Acid Sequence                                  | Sequence No.              | Dephosphorylated fragment[-nHPO <sub>3</sub> ] | CeO <sub>2</sub> /Fe <sub>2</sub> O <sub>3</sub> | CeO <sub>2</sub> /SnO <sub>2</sub> |
|-----------------|--------------------|------------------------------------------------------|---------------------------|------------------------------------------------|--------------------------------------------------|------------------------------------|
| <b>α-casein</b> |                    |                                                      |                           |                                                |                                                  |                                    |
| α-1             | 1197.6             | KNMAINPS*KENL (α <sub>S2</sub> )                     | 39-50 (1P)                | 1117.7                                         | ◆                                                | ◆                                  |
| α-2             | 1253.5             | TVDMMES*TEVF (α <sub>S2</sub> )                      | 153-162(1P)               | 1173.9                                         | ◆                                                | ◆                                  |
| α-3             | 1330.5             | EQLS*TS*EENSK (α <sub>S2</sub> )                     | 141-151(2P)               | 1249.9, 1170.3                                 | ◆                                                | ◆                                  |
| α-4             | 1594.4             | TVDMES*TEVFTKK (α <sub>S2</sub> )                    | 153-165(1P)               | 1514.9                                         | ◆                                                | ◆                                  |
| α-5             | 1759.4             | HQGLPQEVLENLLR (α <sub>S2</sub> )                    | 23-37(N <sub>p</sub> )    | -                                              | ◆                                                | ○                                  |
| α-6             | 1846.9             | KDIGES*ES*TEDQAMEDIK (α <sub>S1</sub> )              | 58-73 (1P)                | 1766.8                                         | ◆                                                | ◆                                  |
| α-7             | 1951.4             | KYKVPQLEIVPNS*AEERL (α <sub>S1</sub> )               | 119-134(1P)               | 1871.9                                         | ◆                                                | ◆                                  |
| α-8             | 2247.5             | KEKVNELS*KDIGES*ES*TEDQA (α <sub>S1</sub> )          | 35-52(3P)                 | 2167.8, 2087.7                                 | ◆                                                | ◆                                  |
| α-9             | 2362.2             | PNS*VEQKHQKEDVPSERY (α <sub>S1</sub> )               | 88-106(1P)                | 2282.9                                         | ◆                                                | ◆                                  |
| α-10            | 2616.4             | NTMEHVS*S*S*EES*IISQETYK (α <sub>S2</sub> )          | 17-36(4P)                 | 2536.9, 2456.7, 2376.3, 2296.3                 | ◆                                                | ◆                                  |
| α-11            | 3132.6             | KNTMEHVS*S*S*EESIIS*QETYKQEK<br>N (α <sub>S2</sub> ) | 16-40(4P)                 | 3052.1, 2975.3, 2892.3, 2812.1                 | ◆                                                | ◆                                  |
| <b>β-casein</b> |                    |                                                      |                           |                                                |                                                  |                                    |
| β-1             | 975.5              | KFQS*EEQQQ                                           | 46-54 (1P)                | 895.4 <sup>***</sup>                           | ○                                                | ◆                                  |
| β-2             | 1994.4             | LLYQEPVLPVVRGPFPIIV                                  | 206-224 (N <sub>p</sub> ) | -                                              | ◆                                                | ○                                  |
| β-3             | 2061.7             | FQS*EEQQQTEDELQDK                                    | 47-62 (1P)                | 1981.7                                         | ○                                                | ◆                                  |
| β-4             | 2186.7             | DMPIQAFLLQEPVLPVVR                                   | 199-217(N <sub>p</sub> )  | -                                              | ◆                                                | ○                                  |
| β-5             | 2556.9             | FQS*EEQQQTEDELQDKIHPF                                | 47-67(1P)                 | 2476.9                                         | ◆                                                | ◆                                  |
| β-6             | 2779.1             | IEKFQS*EEQQQTEDELQDKIHPF                             | 44-67(1P)                 | 2699.8                                         | ○                                                | ◆                                  |
| β-7             | 2965.1             | RELEELNVPGEIVES*LS*S*S*EESITR                        | 15-39 (4P)                | 2885.2, 2805.3, 2725.9, 2646.9                 | ◆                                                | ◆                                  |
| β-8             | 3477.8             | RELEELNVPGEIVES*LS*S*S*EESITRI<br>NK                 | 15-43 (4P)                | 3397.2, 3317.3, 3237.8, 3157.9                 | ◆                                                | ◆                                  |
| β-9             | 3975.8             | RELEELNVPGEIVES*LS*S*S*EESITRI<br>NKKIEKF            | 15-47(4P)                 | 3895.2, 3815.2, 3735.7, 3655.4                 | ○                                                | ◆                                  |

S\* represents the phosphorylation site (phosphoserine)

◆ indicate the detected peptide in the mass spectra

○ indicate the absence of peptide in the mass spectra

\*\*\* Mass peak for dephosphorylated fragment not identified by both nanocomposites
